# Supplementary material
Source: publisher figshare collection journal article supplement (https://acs.figshare.com/ndownloader/files/4758691)
Supplement: Supplementary file 1 [file 4758691]

 
data_x0230 
 
_audit_creation_method            SHELXL-97 
_chemical_name_systematic 
; 
 ? 
; 
_chemical_name_common             ? 
_chemical_melting_point           ? 
_chemical_formula_moiety          ? 
_chemical_formula_sum 
 'C76 H58 Br2 N4 O9' 
_chemical_formula_weight          1331.08 
 
loop_ 
 _atom_type_symbol 
 _atom_type_description 
 _atom_type_scat_dispersion_real 
 _atom_type_scat_dispersion_imag 
 _atom_type_scat_source 
 'C'  'C'   0.0033   0.0016 
 'International Tables Vol C Tables 4.2.6.8 and 6.1.1.4' 
 'H'  'H'   0.0000   0.0000 
 'International Tables Vol C Tables 4.2.6.8 and 6.1.1.4' 
 'N'  'N'   0.0061   0.0033 
 'International Tables Vol C Tables 4.2.6.8 and 6.1.1.4' 
 'O'  'O'   0.0106   0.0060 
 'International Tables Vol C Tables 4.2.6.8 and 6.1.1.4' 
 'Br'  'Br'  -0.2901   2.4595 
 'International Tables Vol C Tables 4.2.6.8 and 6.1.1.4' 
 
 
loop_ 
 _symmetry_equiv_pos_as_xyz 
 'x, y, z' 
 '-x, y+1/2, -z' 
 
_cell_length_a                    15.1342(19) 
_cell_length_b                    10.6675(15) 
_cell_length_c                    19.582(2) 
_cell_angle_alpha                 90.00 
_cell_angle_beta                  101.900(10) 
_cell_angle_gamma                 90.00 
_cell_volume                      3093.5(7) 
_cell_formula_units_Z             2 
 
_exptl_crystal_description        ? 
_exptl_crystal_colour             ? 
_exptl_crystal_density_meas       ? 
_exptl_crystal_density_diffrn     1.429 
_exptl_crystal_density_method     'not measured' 
_exptl_crystal_F_000              1368 
 
_exptl_special_details 
; 
 ? 
; 
 
_diffrn_radiation_wavelength      0.71073 
_diffrn_standards_number         ?
_diffrn_standards_interval_count       1
_diffrn_standards_interval_time       '50'
_diffrn_standards_decay_%         ? 
_diffrn_reflns_number             43133 
_diffrn_reflns_av_R_equivalents   0.0740 
_diffrn_reflns_av_sigmaI/netI     0.1157 
_diffrn_reflns_limit_h_min        -19 
_diffrn_reflns_limit_h_max        19 
_diffrn_reflns_limit_k_min        -13 
_diffrn_reflns_limit_k_max        13 
_diffrn_reflns_limit_l_min        -25 
_diffrn_reflns_limit_l_max        25 
_diffrn_reflns_theta_min          3.72 
_diffrn_reflns_theta_max          27.48 
_diffrn_reflns_resolution_max             0.77 
_reflns_number_total              13936 
_reflns_number_gt                 8782 
_reflns_threshold_expression      >2sigma(I) 
 
_computing_data_collection         'Oxford Diffraction CrysAlis CCD'
_computing_cell_refinement         'Oxford Diffraction CrysAlis RED'
_computing_data_reduction          'Oxford Diffraction CrysAlis RED'
_computing_structure_solution         'Sheldrick, G.M. (2000). SHELXTL v6.10.'
_computing_structure_refinement         'Sheldrick, G.M. (2000). SHELXTL v6.10.'
_computing_molecular_graphics         'Sheldrick, G.M. (2000). SHELXTL v6.10.'
_computing_publication_material         'Sheldrick, G.M. (2000). SHELXTL v6.10.'
 
_refine_special_details 
; 
 Refinement of F^2^ against ALL reflections.  The weighted R-factor wR and 
 goodness of fit S are based on F^2^, conventional R-factors R are based 
 on F, with F set to zero for negative F^2^. The threshold expression of 
 F^2^ > 2sigma(F^2^) is used only for calculating R-factors(gt) etc. and is 
 not relevant to the choice of reflections for refinement.  R-factors based 
 on F^2^ are statistically about twice as large as those based on F, and R- 
 factors based on ALL data will be even larger. 
; 
 
_refine_ls_structure_factor_coef  Fsqd  
_refine_ls_matrix_type            full 
_refine_ls_weighting_scheme       calc  
_refine_ls_weighting_details 
 'calc w=1/[\s^2^(Fo^2^)+(0.0466P)^2^+0.0000P] where P=(Fo^2^+2Fc^2^)/3' 
_atom_sites_solution_primary      direct 
_atom_sites_solution_secondary    difmap 
_atom_sites_solution_hydrogens    geom 
_refine_ls_hydrogen_treatment     mixed 
_refine_ls_extinction_method      none 
_refine_ls_extinction_coef        ? 
_refine_ls_abs_structure_details 
 'Flack H D (1983), Acta Cryst. A39, 876-881' 
_refine_ls_abs_structure_Flack    0.023(6) 
_refine_ls_number_reflns          13936 
_refine_ls_number_parameters      775 
_refine_ls_number_restraints      1 
_refine_ls_R_factor_all           0.0858 
_refine_ls_R_factor_gt            0.0480 
_refine_ls_wR_factor_ref          0.1069 
_refine_ls_wR_factor_gt           0.1003 
_refine_ls_goodness_of_fit_ref    0.952 
_refine_ls_restrained_S_all       0.952 
_refine_ls_shift/su_max           0.002 
_refine_ls_shift/su_mean          0.000 
 
loop_ 
 _atom_site_label 
 _atom_site_type_symbol 
 _atom_site_fract_x 
 _atom_site_fract_y 
 _atom_site_fract_z 
 _atom_site_U_iso_or_equiv 
 _atom_site_adp_type 
 _atom_site_occupancy 
 _atom_site_symmetry_multiplicity 
 _atom_site_calc_flag 
 _atom_site_refinement_flags 
 _atom_site_disorder_assembly 
 _atom_site_disorder_group 
Br1 Br -0.33466(3) 0.24451(4) 0.04617(3) 0.03615(13) Uani 1 1 d . . . 
N1 N 0.15432(19) 0.3055(3) 0.11337(17) 0.0171(7) Uani 1 1 d . . . 
N2 N 0.21473(19) 0.0610(3) 0.11800(16) 0.0167(7) Uani 1 1 d . . . 
O1 O 0.07898(14) 0.2486(3) 0.19797(12) 0.0183(5) Uani 1 1 d . . . 
O2 O 0.23012(16) -0.1099(3) 0.18684(14) 0.0236(6) Uani 1 1 d . . . 
O3 O 0.24198(18) 0.4785(3) 0.14253(15) 0.0285(7) Uani 1 1 d . . . 
O4 O 0.29933(17) 0.1846(3) -0.15850(14) 0.0315(7) Uani 1 1 d . . . 
C1 C 0.1151(2) 0.2191(4) 0.15077(19) 0.0179(9) Uani 1 1 d . . . 
C2 C 0.1223(2) 0.0812(4) 0.1291(2) 0.0165(9) Uani 1 1 d . . . 
H2 H 0.1137 0.0269 0.1688 0.020 Uiso 1 1 calc R . . 
C3 C 0.2374(2) 0.1398(4) 0.06507(19) 0.0142(8) Uani 1 1 d . . . 
C4 C 0.2027(2) 0.2627(4) 0.06197(19) 0.0172(9) Uani 1 1 d . . . 
C5 C 0.0514(2) 0.0433(4) 0.0642(2) 0.0214(10) Uani 1 1 d . . . 
H5A H 0.0720 0.0731 0.0222 0.026 Uiso 1 1 calc R . . 
H5B H 0.0485 -0.0493 0.0619 0.026 Uiso 1 1 calc R . . 
C6 C -0.0415(2) 0.0924(4) 0.0618(2) 0.0176(9) Uani 1 1 d . . . 
C7 C -0.0897(2) 0.0623(4) 0.1117(2) 0.0189(9) Uani 1 1 d . . . 
H7 H -0.0631 0.0103 0.1498 0.023 Uiso 1 1 calc R . . 
C8 C -0.1769(2) 0.1075(4) 0.1070(2) 0.0216(9) Uani 1 1 d . . . 
H8 H -0.2100 0.0859 0.1416 0.026 Uiso 1 1 calc R . . 
C9 C -0.2154(2) 0.1838(4) 0.0519(2) 0.0211(10) Uani 1 1 d . . . 
C10 C -0.1689(2) 0.2156(4) 0.0013(2) 0.0236(10) Uani 1 1 d . . . 
H10 H -0.1961 0.2670 -0.0369 0.028 Uiso 1 1 calc R . . 
C11 C -0.0813(2) 0.1713(4) 0.0068(2) 0.0208(9) Uani 1 1 d . . . 
H11 H -0.0479 0.1949 -0.0272 0.025 Uiso 1 1 calc R . . 
C12 C 0.2652(2) -0.0328(4) 0.15466(19) 0.0164(9) Uani 1 1 d . . . 
C13 C 0.3641(2) -0.0374(4) 0.15711(18) 0.0175(9) Uani 1 1 d . . . 
C14 C 0.4040(3) -0.1544(4) 0.1542(2) 0.0251(10) Uani 1 1 d . . . 
H14 H 0.3670 -0.2271 0.1469 0.030 Uiso 1 1 calc R . . 
C15 C 0.4966(3) -0.1670(4) 0.1617(2) 0.0298(11) Uani 1 1 d . . . 
H15 H 0.5227 -0.2473 0.1587 0.036 Uiso 1 1 calc R . . 
C16 C 0.5503(3) -0.0620(5) 0.1735(2) 0.0341(12) Uani 1 1 d . . . 
H16 H 0.6139 -0.0698 0.1795 0.041 Uiso 1 1 calc R . . 
C17 C 0.5114(3) 0.0559(5) 0.1768(2) 0.0295(11) Uani 1 1 d . . . 
H17 H 0.5490 0.1280 0.1846 0.035 Uiso 1 1 calc R . . 
C18 C 0.4181(2) 0.0693(4) 0.1687(2) 0.0235(10) Uani 1 1 d . . . 
H18 H 0.3919 0.1497 0.1711 0.028 Uiso 1 1 calc R . . 
C19 C 0.1674(3) 0.4354(4) 0.13538(19) 0.0191(9) Uani 1 1 d . . . 
C20 C 0.0871(2) 0.5072(4) 0.1437(2) 0.0196(9) Uani 1 1 d . . . 
C21 C 0.1022(3) 0.6274(4) 0.1740(2) 0.0277(10) Uani 1 1 d . . . 
H21 H 0.1621 0.6556 0.1914 0.033 Uiso 1 1 calc R . . 
C22 C 0.0301(3) 0.7039(4) 0.1785(2) 0.0289(11) Uani 1 1 d . . . 
H22 H 0.0401 0.7849 0.1988 0.035 Uiso 1 1 calc R . . 
C23 C -0.0574(3) 0.6615(5) 0.1531(2) 0.0344(12) Uani 1 1 d . . . 
H23 H -0.1073 0.7136 0.1563 0.041 Uiso 1 1 calc R . . 
C24 C -0.0721(3) 0.5438(4) 0.1232(2) 0.0283(11) Uani 1 1 d . . . 
H24 H -0.1322 0.5163 0.1055 0.034 Uiso 1 1 calc R . . 
C25 C -0.0014(2) 0.4664(4) 0.11878(19) 0.0208(9) Uani 1 1 d . . . 
H25 H -0.0124 0.3853 0.0988 0.025 Uiso 1 1 calc R . . 
C26 C 0.2809(2) 0.0995(4) 0.0134(2) 0.0166(9) Uani 1 1 d . . . 
H26 H 0.3043 0.0166 0.0153 0.020 Uiso 1 1 calc R . . 
C27 C 0.2912(2) 0.1778(4) -0.04115(19) 0.0154(9) Uani 1 1 d . . . 
C28 C 0.2552(2) 0.2992(4) -0.0434(2) 0.0184(9) Uani 1 1 d . . . 
H28 H 0.2609 0.3534 -0.0807 0.022 Uiso 1 1 calc R . . 
C29 C 0.2118(2) 0.3413(4) 0.0073(2) 0.0181(9) Uani 1 1 d . . . 
H29 H 0.1880 0.4239 0.0049 0.022 Uiso 1 1 calc R . . 
C30 C 0.3304(2) 0.1376(4) -0.1003(2) 0.0202(9) Uani 1 1 d . . . 
C31 C 0.4061(2) 0.0476(4) -0.0932(2) 0.0181(9) Uani 1 1 d . . . 
C32 C 0.4651(2) 0.0269(4) -0.0291(2) 0.0202(9) Uani 1 1 d . . . 
H32 H 0.4555 0.0691 0.0115 0.024 Uiso 1 1 calc R . . 
C33 C 0.5372(3) -0.0543(4) -0.0244(2) 0.0288(10) Uani 1 1 d . . . 
H33 H 0.5765 -0.0688 0.0194 0.035 Uiso 1 1 calc R . . 
C34 C 0.5522(3) -0.1147(4) -0.0836(2) 0.0296(10) Uani 1 1 d . . . 
H34 H 0.6014 -0.1711 -0.0802 0.036 Uiso 1 1 calc R . . 
C35 C 0.4953(3) -0.0929(4) -0.1479(2) 0.0279(11) Uani 1 1 d . . . 
H35 H 0.5062 -0.1331 -0.1887 0.033 Uiso 1 1 calc R . . 
C36 C 0.4228(2) -0.0123(4) -0.1523(2) 0.0204(9) Uani 1 1 d . . . 
H36 H 0.3839 0.0022 -0.1962 0.024 Uiso 1 1 calc R . . 
Br2 Br 0.63466(3) -0.12175(6) 0.42440(3) 0.05982(19) Uani 1 1 d . . . 
N101 N 0.2221(2) 0.3150(3) 0.33930(17) 0.0183(8) Uani 1 1 d . . . 
N102 N 0.09498(19) 0.1328(3) 0.33969(16) 0.0156(7) Uani 1 1 d . . . 
O101 O 0.27475(16) 0.1926(3) 0.26014(13) 0.0213(6) Uani 1 1 d . . . 
O102 O 0.02996(16) -0.0239(3) 0.26827(13) 0.0189(6) Uani 1 1 d . . . 
O103 O 0.21999(19) 0.5204(3) 0.30511(15) 0.0296(7) Uani 1 1 d . . . 
O104 O 0.0098(2) 0.4290(3) 0.57876(16) 0.0430(9) Uani 1 1 d . . . 
C101 C 0.2316(2) 0.2025(4) 0.3058(2) 0.0184(9) Uani 1 1 d . . . 
C102 C 0.1857(2) 0.0938(4) 0.3348(2) 0.0184(9) Uani 1 1 d . . . 
H102 H 0.1812 0.0214 0.3018 0.022 Uiso 1 1 calc R . . 
C103 C 0.0936(2) 0.2377(4) 0.38324(18) 0.0173(8) Uani 1 1 d . . . 
C104 C 0.1597(2) 0.3272(4) 0.3847(2) 0.0175(9) Uani 1 1 d . . . 
C105 C 0.2401(2) 0.0531(4) 0.4064(2) 0.0209(9) Uani 1 1 d . . . 
H05A H 0.2419 0.1240 0.4393 0.025 Uiso 1 1 calc R . . 
H05B H 0.2076 -0.0166 0.4238 0.025 Uiso 1 1 calc R . . 
C106 C 0.3368(2) 0.0109(4) 0.4081(2) 0.0211(9) Uani 1 1 d . . . 
C107 C 0.3619(3) -0.0535(4) 0.3535(2) 0.0249(10) Uani 1 1 d . . . 
H107 H 0.3178 -0.0723 0.3127 0.030 Uiso 1 1 calc R . . 
C108 C 0.4508(3) -0.0909(4) 0.3579(2) 0.0312(11) Uani 1 1 d . . . 
H108 H 0.4681 -0.1330 0.3199 0.037 Uiso 1 1 calc R . . 
C109 C 0.5133(3) -0.0661(5) 0.4176(3) 0.0359(12) Uani 1 1 d . . . 
C110 C 0.4898(3) -0.0024(5) 0.4737(2) 0.0384(13) Uani 1 1 d . . . 
H110 H 0.5340 0.0134 0.5149 0.046 Uiso 1 1 calc R . . 
C111 C 0.4029(3) 0.0368(4) 0.4688(2) 0.0273(10) Uani 1 1 d . . . 
H111 H 0.3867 0.0817 0.5063 0.033 Uiso 1 1 calc R . . 
C112 C 0.0210(2) 0.0738(4) 0.29955(19) 0.0163(9) Uani 1 1 d . . . 
C113 C -0.0708(2) 0.1340(4) 0.29105(19) 0.0164(9) Uani 1 1 d . . . 
C114 C -0.1424(2) 0.0599(4) 0.2982(2) 0.0208(9) Uani 1 1 d . . . 
H114 H -0.1323 -0.0251 0.3121 0.025 Uiso 1 1 calc R . . 
C115 C -0.2301(3) 0.1083(5) 0.2853(2) 0.0291(11) Uani 1 1 d . . . 
H115 H -0.2791 0.0566 0.2910 0.035 Uiso 1 1 calc R . . 
C116 C -0.2452(2) 0.2314(5) 0.2642(2) 0.0301(11) Uani 1 1 d . . . 
H116 H -0.3046 0.2651 0.2557 0.036 Uiso 1 1 calc R . . 
C117 C -0.1728(3) 0.3057(4) 0.2554(2) 0.0251(10) Uani 1 1 d . . . 
H117 H -0.1827 0.3898 0.2396 0.030 Uiso 1 1 calc R . . 
C118 C -0.0859(2) 0.2565(4) 0.26978(19) 0.0235(9) Uani 1 1 d . . . 
H118 H -0.0363 0.3080 0.2649 0.028 Uiso 1 1 calc R . . 
C119 C 0.2653(3) 0.4288(4) 0.3202(2) 0.0243(10) Uani 1 1 d . . . 
C120 C 0.3657(3) 0.4274(4) 0.3268(2) 0.0239(10) Uani 1 1 d . . . 
C121 C 0.4051(3) 0.5318(5) 0.3036(2) 0.0351(11) Uani 1 1 d . . . 
H121 H 0.3679 0.5976 0.2808 0.042 Uiso 1 1 calc R . . 
C122 C 0.4978(3) 0.5413(5) 0.3132(2) 0.0390(12) Uani 1 1 d . . . 
H122 H 0.5249 0.6128 0.2971 0.047 Uiso 1 1 calc R . . 
C123 C 0.5502(3) 0.4451(6) 0.3464(2) 0.0440(14) Uani 1 1 d . . . 
H123 H 0.6141 0.4517 0.3540 0.053 Uiso 1 1 calc R . . 
C124 C 0.5123(3) 0.3393(5) 0.3690(3) 0.0428(13) Uani 1 1 d . . . 
H124 H 0.5498 0.2730 0.3906 0.051 Uiso 1 1 calc R . . 
C125 C 0.4210(3) 0.3303(4) 0.3600(2) 0.0314(11) Uani 1 1 d . . . 
H125 H 0.3946 0.2583 0.3763 0.038 Uiso 1 1 calc R . . 
C126 C 0.0353(2) 0.2467(4) 0.42944(18) 0.0204(8) Uani 1 1 d . . . 
H126 H -0.0088 0.1835 0.4299 0.024 Uiso 1 1 calc R . . 
C127 C 0.0412(2) 0.3476(4) 0.4749(2) 0.0217(10) Uani 1 1 d . . . 
C128 C 0.1105(3) 0.4356(4) 0.4766(2) 0.0244(10) Uani 1 1 d . . . 
H128 H 0.1168 0.5029 0.5090 0.029 Uiso 1 1 calc R . . 
C129 C 0.1693(2) 0.4260(4) 0.4321(2) 0.0199(9) Uani 1 1 d . . . 
H129 H 0.2160 0.4860 0.4336 0.024 Uiso 1 1 calc R . . 
C130 C -0.0173(3) 0.3628(4) 0.5273(2) 0.0267(10) Uani 1 1 d . . . 
C131 C -0.1066(3) 0.3006(4) 0.5209(2) 0.0257(10) Uani 1 1 d . . . 
C132 C -0.1633(3) 0.2794(4) 0.4561(2) 0.0288(11) Uani 1 1 d . . . 
H132 H -0.1422 0.2940 0.4143 0.035 Uiso 1 1 calc R . . 
C133 C -0.2497(3) 0.2373(5) 0.4529(2) 0.0385(11) Uani 1 1 d . . . 
H133 H -0.2888 0.2234 0.4089 0.046 Uiso 1 1 calc R . . 
C134 C -0.2800(3) 0.2150(4) 0.5144(3) 0.0404(13) Uani 1 1 d . . . 
H134 H -0.3401 0.1872 0.5122 0.048 Uiso 1 1 calc R . . 
C135 C -0.2235(3) 0.2328(5) 0.5782(3) 0.0375(11) Uani 1 1 d . . . 
H135 H -0.2441 0.2153 0.6198 0.045 Uiso 1 1 calc R . . 
C136 C -0.1381(3) 0.2757(4) 0.5816(2) 0.0326(11) Uani 1 1 d . . . 
H136 H -0.0995 0.2888 0.6258 0.039 Uiso 1 1 calc R . . 
 
loop_ 
 _atom_site_aniso_label 
 _atom_site_aniso_U_11 
 _atom_site_aniso_U_22 
 _atom_site_aniso_U_33 
 _atom_site_aniso_U_23 
 _atom_site_aniso_U_13 
 _atom_site_aniso_U_12 
Br1 0.0236(2) 0.0361(3) 0.0476(3) -0.0028(3) 0.0048(2) 0.0092(2) 
N1 0.0158(16) 0.0176(19) 0.0177(18) -0.0017(15) 0.0030(14) 0.0001(14) 
N2 0.0155(15) 0.0179(19) 0.0172(18) -0.0017(15) 0.0044(14) -0.0001(14) 
O1 0.0185(12) 0.0224(15) 0.0152(13) 0.0010(14) 0.0063(11) 0.0029(13) 
O2 0.0249(13) 0.0196(16) 0.0260(16) 0.0074(14) 0.0042(12) -0.0005(13) 
O3 0.0251(15) 0.0299(19) 0.0317(17) -0.0075(15) 0.0086(14) -0.0049(13) 
O4 0.0312(15) 0.042(2) 0.0210(16) 0.0046(15) 0.0053(13) 0.0138(14) 
C1 0.0082(16) 0.028(3) 0.015(2) 0.0014(19) -0.0029(15) 0.0034(16) 
C2 0.0155(18) 0.017(2) 0.018(2) -0.0036(18) 0.0069(16) 0.0014(16) 
C3 0.0119(17) 0.015(2) 0.015(2) 0.0004(18) 0.0014(16) -0.0015(16) 
C4 0.0129(16) 0.023(3) 0.016(2) 0.0000(19) 0.0031(15) -0.0027(17) 
C5 0.0195(19) 0.022(2) 0.021(2) -0.003(2) 0.0006(17) -0.0019(18) 
C6 0.0189(19) 0.017(2) 0.016(2) -0.0043(18) 0.0012(17) -0.0057(17) 
C7 0.023(2) 0.019(2) 0.014(2) -0.0010(18) 0.0008(17) 0.0036(17) 
C8 0.022(2) 0.025(2) 0.018(2) -0.0069(19) 0.0052(17) -0.0044(18) 
C9 0.0161(19) 0.018(2) 0.028(2) -0.010(2) 0.0010(18) -0.0011(17) 
C10 0.023(2) 0.020(3) 0.024(2) 0.0014(19) -0.0047(18) 0.0004(17) 
C11 0.026(2) 0.020(2) 0.018(2) -0.0067(19) 0.0072(18) -0.0103(18) 
C12 0.0210(19) 0.015(2) 0.012(2) -0.0053(18) -0.0008(17) -0.0018(17) 
C13 0.0230(19) 0.021(2) 0.0077(19) 0.0004(18) 0.0010(16) 0.0018(17) 
C14 0.029(2) 0.022(3) 0.022(2) 0.004(2) 0.0005(18) 0.0049(19) 
C15 0.030(2) 0.030(3) 0.028(3) -0.002(2) 0.004(2) 0.009(2) 
C16 0.021(2) 0.050(3) 0.031(3) 0.000(2) 0.002(2) 0.014(2) 
C17 0.019(2) 0.039(3) 0.028(3) -0.003(2) -0.0013(19) -0.004(2) 
C18 0.022(2) 0.023(3) 0.022(2) 0.002(2) -0.0027(18) 0.0068(18) 
C19 0.023(2) 0.022(2) 0.011(2) 0.0000(18) 0.0021(17) -0.0028(18) 
C20 0.026(2) 0.019(2) 0.013(2) 0.0021(18) 0.0052(17) 0.0067(18) 
C21 0.040(2) 0.026(3) 0.015(2) -0.002(2) 0.0005(19) 0.006(2) 
C22 0.047(3) 0.020(3) 0.020(2) -0.0001(19) 0.005(2) 0.014(2) 
C23 0.045(3) 0.039(3) 0.022(2) 0.009(2) 0.011(2) 0.029(2) 
C24 0.025(2) 0.039(3) 0.020(2) 0.002(2) 0.0015(18) 0.011(2) 
C25 0.025(2) 0.021(2) 0.015(2) 0.0002(19) 0.0031(17) 0.0043(18) 
C26 0.0115(17) 0.019(2) 0.017(2) -0.0032(18) -0.0015(16) 0.0031(16) 
C27 0.0124(17) 0.019(2) 0.015(2) 0.0038(18) 0.0040(16) 0.0001(17) 
C28 0.0169(19) 0.023(2) 0.015(2) 0.0088(18) 0.0025(17) -0.0019(17) 
C29 0.0190(19) 0.014(2) 0.019(2) 0.0065(18) -0.0001(17) -0.0024(16) 
C30 0.0154(18) 0.024(2) 0.021(2) 0.001(2) 0.0035(17) 0.0014(17) 
C31 0.0185(18) 0.015(2) 0.023(2) 0.0048(19) 0.0089(17) -0.0035(16) 
C32 0.0196(19) 0.024(2) 0.019(2) -0.0040(19) 0.0086(17) -0.0006(17) 
C33 0.021(2) 0.040(3) 0.024(2) -0.002(2) 0.0013(19) 0.0056(19) 
C34 0.025(2) 0.032(3) 0.034(3) -0.006(2) 0.011(2) 0.008(2) 
C35 0.036(2) 0.027(3) 0.025(2) -0.009(2) 0.016(2) 0.003(2) 
C36 0.022(2) 0.023(2) 0.018(2) 0.0005(19) 0.0075(17) -0.0029(17) 
Br2 0.0232(2) 0.0711(4) 0.0817(4) 0.0098(4) 0.0026(3) 0.0138(3) 
N101 0.0174(16) 0.0173(19) 0.0188(19) -0.0041(16) 0.0003(14) -0.0019(14) 
N102 0.0156(15) 0.0159(19) 0.0151(17) -0.0036(15) 0.0026(13) -0.0006(14) 
O101 0.0187(12) 0.0297(17) 0.0153(15) 0.0011(13) 0.0032(12) 0.0004(12) 
O102 0.0226(14) 0.0166(16) 0.0178(14) -0.0027(13) 0.0048(12) -0.0003(12) 
O103 0.0395(17) 0.0248(18) 0.0236(17) 0.0061(15) 0.0048(14) 0.0068(15) 
O104 0.0548(19) 0.050(2) 0.0293(18) -0.0198(17) 0.0198(16) -0.0125(17) 
C101 0.0141(18) 0.023(2) 0.014(2) 0.0017(18) -0.0058(17) 0.0005(16) 
C102 0.0125(18) 0.026(2) 0.016(2) -0.0050(19) 0.0027(16) 0.0005(17) 
C103 0.0171(17) 0.019(2) 0.0129(18) -0.002(2) -0.0040(15) 0.0065(19) 
C104 0.0149(18) 0.021(2) 0.015(2) 0.0038(19) 0.0011(16) 0.0024(16) 
C105 0.023(2) 0.022(2) 0.019(2) -0.0018(19) 0.0072(18) 0.0003(18) 
C106 0.023(2) 0.016(2) 0.023(2) 0.0084(19) 0.0030(18) 0.0011(17) 
C107 0.023(2) 0.023(2) 0.027(2) 0.004(2) 0.0005(19) 0.0064(18) 
C108 0.026(2) 0.032(3) 0.036(3) 0.000(2) 0.007(2) 0.009(2) 
C109 0.017(2) 0.037(3) 0.050(3) 0.018(3) -0.001(2) 0.004(2) 
C110 0.025(2) 0.047(3) 0.036(3) 0.007(3) -0.010(2) -0.003(2) 
C111 0.026(2) 0.032(3) 0.023(2) 0.005(2) 0.0028(19) -0.001(2) 
C112 0.0211(19) 0.018(2) 0.011(2) 0.0033(18) 0.0058(16) -0.0015(17) 
C113 0.0175(18) 0.018(2) 0.012(2) -0.0023(18) 0.0005(16) -0.0006(17) 
C114 0.022(2) 0.020(2) 0.019(2) -0.0004(19) 0.0035(18) -0.0014(18) 
C115 0.018(2) 0.044(3) 0.026(3) 0.002(2) 0.0060(18) -0.009(2) 
C116 0.0193(19) 0.039(3) 0.031(2) -0.002(3) 0.0032(18) 0.012(2) 
C117 0.027(2) 0.021(2) 0.026(2) 0.001(2) 0.0031(19) 0.0089(19) 
C118 0.0208(18) 0.030(3) 0.020(2) -0.002(2) 0.0047(16) -0.005(2) 
C119 0.035(2) 0.021(3) 0.014(2) -0.0002(19) 0.0006(19) -0.007(2) 
C120 0.023(2) 0.033(3) 0.017(2) -0.005(2) 0.0081(18) -0.013(2) 
C121 0.044(3) 0.031(3) 0.034(3) -0.006(2) 0.017(2) -0.009(2) 
C122 0.043(3) 0.041(3) 0.039(3) -0.011(3) 0.023(2) -0.016(3) 
C123 0.025(2) 0.074(4) 0.034(3) -0.020(3) 0.009(2) -0.013(3) 
C124 0.023(2) 0.062(4) 0.040(3) 0.001(3) -0.001(2) -0.005(2) 
C125 0.024(2) 0.036(3) 0.033(3) 0.001(2) 0.003(2) -0.008(2) 
C126 0.0218(18) 0.019(2) 0.018(2) 0.000(2) -0.0001(15) -0.003(2) 
C127 0.027(2) 0.024(3) 0.014(2) -0.0011(19) 0.0027(17) 0.0018(18) 
C128 0.027(2) 0.024(3) 0.018(2) -0.004(2) -0.0060(19) 0.0010(19) 
C129 0.0178(18) 0.022(2) 0.018(2) 0.0013(19) -0.0007(17) 0.0013(17) 
C130 0.033(2) 0.026(3) 0.023(2) -0.008(2) 0.0117(19) -0.001(2) 
C131 0.029(2) 0.021(2) 0.029(3) -0.001(2) 0.010(2) 0.0076(19) 
C132 0.025(2) 0.037(3) 0.027(2) -0.008(2) 0.0129(18) 0.004(2) 
C133 0.029(2) 0.040(3) 0.046(3) -0.004(3) 0.007(2) 0.006(2) 
C134 0.028(2) 0.033(3) 0.067(4) 0.000(3) 0.027(3) 0.001(2) 
C135 0.051(3) 0.027(3) 0.044(3) 0.005(3) 0.030(2) 0.008(2) 
C136 0.039(2) 0.031(3) 0.032(3) 0.000(2) 0.019(2) 0.007(2) 
 
_geom_special_details 
; 
 All esds (except the esd in the dihedral angle between two l.s. planes) 
 are estimated using the full covariance matrix.  The cell esds are taken 
 into account individually in the estimation of esds in distances, angles 
 and torsion angles; correlations between esds in cell parameters are only 
 used when they are defined by crystal symmetry.  An approximate (isotropic) 
 treatment of cell esds is used for estimating esds involving l.s. planes. 
; 
 
loop_ 
 _geom_bond_atom_site_label_1 
 _geom_bond_atom_site_label_2 
 _geom_bond_distance 
 _geom_bond_site_symmetry_2 
 _geom_bond_publ_flag 
Br1 C9 1.899(4) . ? 
N1 C1 1.385(5) . ? 
N1 C4 1.436(5) . ? 
N1 C19 1.452(5) . ? 
N2 C12 1.369(5) . ? 
N2 C3 1.430(5) . ? 
N2 C2 1.475(4) . ? 
O1 C1 1.208(4) . ? 
O2 C12 1.222(4) . ? 
O3 C19 1.200(4) . ? 
O4 C30 1.246(4) . ? 
C1 C2 1.541(6) . ? 
C2 C5 1.538(5) . ? 
C2 H2 1.0000 . ? 
C3 C26 1.385(5) . ? 
C3 C4 1.409(5) . ? 
C4 C29 1.389(5) . ? 
C5 C6 1.492(5) . ? 
C5 H5A 0.9900 . ? 
C5 H5B 0.9900 . ? 
C6 C7 1.373(5) . ? 
C6 C11 1.400(5) . ? 
C7 C8 1.391(5) . ? 
C7 H7 0.9500 . ? 
C8 C9 1.382(6) . ? 
C8 H8 0.9500 . ? 
C9 C10 1.371(6) . ? 
C10 C11 1.391(5) . ? 
C10 H10 0.9500 . ? 
C11 H11 0.9500 . ? 
C12 C13 1.487(5) . ? 
C13 C18 1.393(5) . ? 
C13 C14 1.393(6) . ? 
C14 C15 1.384(5) . ? 
C14 H14 0.9500 . ? 
C15 C16 1.375(6) . ? 
C15 H15 0.9500 . ? 
C16 C17 1.396(6) . ? 
C16 H16 0.9500 . ? 
C17 C18 1.395(5) . ? 
C17 H17 0.9500 . ? 
C18 H18 0.9500 . ? 
C19 C20 1.474(5) . ? 
C20 C25 1.397(5) . ? 
C20 C21 1.411(6) . ? 
C21 C22 1.380(6) . ? 
C21 H21 0.9500 . ? 
C22 C23 1.391(6) . ? 
C22 H22 0.9500 . ? 
C23 C24 1.384(6) . ? 
C23 H23 0.9500 . ? 
C24 C25 1.368(5) . ? 
C24 H24 0.9500 . ? 
C25 H25 0.9500 . ? 
C26 C27 1.390(5) . ? 
C26 H26 0.9500 . ? 
C27 C28 1.402(5) . ? 
C27 C30 1.469(5) . ? 
C28 C29 1.373(5) . ? 
C28 H28 0.9500 . ? 
C29 H29 0.9500 . ? 
C30 C31 1.480(5) . ? 
C31 C36 1.390(5) . ? 
C31 C32 1.399(5) . ? 
C32 C33 1.382(5) . ? 
C32 H32 0.9500 . ? 
C33 C34 1.385(6) . ? 
C33 H33 0.9500 . ? 
C34 C35 1.392(6) . ? 
C34 H34 0.9500 . ? 
C35 C36 1.382(5) . ? 
C35 H35 0.9500 . ? 
C36 H36 0.9500 . ? 
Br2 C109 1.908(4) . ? 
N101 C101 1.390(5) . ? 
N101 C104 1.430(5) . ? 
N101 C119 1.464(5) . ? 
N102 C112 1.380(5) . ? 
N102 C103 1.409(5) . ? 
N102 C102 1.457(4) . ? 
O101 C101 1.215(4) . ? 
O102 C112 1.231(4) . ? 
O103 C119 1.195(5) . ? 
O104 C130 1.230(5) . ? 
C101 C102 1.520(6) . ? 
C102 C105 1.535(5) . ? 
C102 H102 1.0000 . ? 
C103 C104 1.380(5) . ? 
C103 C126 1.391(5) . ? 
C104 C129 1.392(5) . ? 
C105 C106 1.525(5) . ? 
C105 H05A 0.9900 . ? 
C105 H05B 0.9900 . ? 
C106 C107 1.389(6) . ? 
C106 C111 1.413(5) . ? 
C107 C108 1.389(5) . ? 
C107 H107 0.9500 . ? 
C108 C109 1.370(6) . ? 
C108 H108 0.9500 . ? 
C109 C110 1.398(7) . ? 
C110 C111 1.366(6) . ? 
C110 H110 0.9500 . ? 
C111 H111 0.9500 . ? 
C112 C113 1.509(5) . ? 
C113 C114 1.372(5) . ? 
C113 C118 1.376(6) . ? 
C114 C115 1.396(5) . ? 
C114 H114 0.9500 . ? 
C115 C116 1.382(7) . ? 
C115 H115 0.9500 . ? 
C116 C117 1.392(6) . ? 
C116 H116 0.9500 . ? 
C117 C118 1.390(5) . ? 
C117 H117 0.9500 . ? 
C118 H118 0.9500 . ? 
C119 C120 1.498(5) . ? 
C120 C121 1.384(6) . ? 
C120 C125 1.404(6) . ? 
C121 C122 1.381(6) . ? 
C121 H121 0.9500 . ? 
C122 C123 1.376(7) . ? 
C122 H122 0.9500 . ? 
C123 C124 1.379(7) . ? 
C123 H123 0.9500 . ? 
C124 C125 1.359(5) . ? 
C124 H124 0.9500 . ? 
C125 H125 0.9500 . ? 
C126 C127 1.388(6) . ? 
C126 H126 0.9500 . ? 
C127 C128 1.403(5) . ? 
C127 C130 1.495(5) . ? 
C128 C129 1.371(5) . ? 
C128 H128 0.9500 . ? 
C129 H129 0.9500 . ? 
C130 C131 1.487(6) . ? 
C131 C136 1.395(6) . ? 
C131 C132 1.397(6) . ? 
C132 C133 1.371(6) . ? 
C132 H132 0.9500 . ? 
C133 C134 1.395(6) . ? 
C133 H133 0.9500 . ? 
C134 C135 1.373(6) . ? 
C134 H134 0.9500 . ? 
C135 C136 1.360(6) . ? 
C135 H135 0.9500 . ? 
C136 H136 0.9500 . ? 
 
loop_ 
 _geom_angle_atom_site_label_1 
 _geom_angle_atom_site_label_2 
 _geom_angle_atom_site_label_3 
 _geom_angle 
 _geom_angle_site_symmetry_1 
 _geom_angle_site_symmetry_3 
 _geom_angle_publ_flag 
C1 N1 C4 119.7(3) . . ? 
C1 N1 C19 121.7(3) . . ? 
C4 N1 C19 117.0(3) . . ? 
C12 N2 C3 128.2(3) . . ? 
C12 N2 C2 118.2(3) . . ? 
C3 N2 C2 113.4(3) . . ? 
O1 C1 N1 122.8(4) . . ? 
O1 C1 C2 121.9(4) . . ? 
N1 C1 C2 115.3(3) . . ? 
N2 C2 C5 111.2(3) . . ? 
N2 C2 C1 107.6(3) . . ? 
C5 C2 C1 113.6(3) . . ? 
N2 C2 H2 108.1 . . ? 
C5 C2 H2 108.1 . . ? 
C1 C2 H2 108.1 . . ? 
C26 C3 C4 119.1(4) . . ? 
C26 C3 N2 124.6(3) . . ? 
C4 C3 N2 115.8(3) . . ? 
C29 C4 C3 120.0(3) . . ? 
C29 C4 N1 119.7(4) . . ? 
C3 C4 N1 120.3(3) . . ? 
C6 C5 C2 115.3(3) . . ? 
C6 C5 H5A 108.5 . . ? 
C2 C5 H5A 108.5 . . ? 
C6 C5 H5B 108.5 . . ? 
C2 C5 H5B 108.5 . . ? 
H5A C5 H5B 107.5 . . ? 
C7 C6 C11 118.7(3) . . ? 
C7 C6 C5 122.0(4) . . ? 
C11 C6 C5 119.2(4) . . ? 
C6 C7 C8 120.5(4) . . ? 
C6 C7 H7 119.7 . . ? 
C8 C7 H7 119.7 . . ? 
C9 C8 C7 119.8(4) . . ? 
C9 C8 H8 120.1 . . ? 
C7 C8 H8 120.1 . . ? 
C10 C9 C8 121.0(4) . . ? 
C10 C9 Br1 119.7(3) . . ? 
C8 C9 Br1 119.3(3) . . ? 
C9 C10 C11 118.8(4) . . ? 
C9 C10 H10 120.6 . . ? 
C11 C10 H10 120.6 . . ? 
C10 C11 C6 121.1(4) . . ? 
C10 C11 H11 119.4 . . ? 
C6 C11 H11 119.4 . . ? 
O2 C12 N2 120.5(3) . . ? 
O2 C12 C13 120.2(3) . . ? 
N2 C12 C13 119.3(3) . . ? 
C18 C13 C14 119.6(3) . . ? 
C18 C13 C12 122.1(4) . . ? 
C14 C13 C12 118.1(4) . . ? 
C15 C14 C13 121.4(4) . . ? 
C15 C14 H14 119.3 . . ? 
C13 C14 H14 119.3 . . ? 
C16 C15 C14 119.3(4) . . ? 
C16 C15 H15 120.4 . . ? 
C14 C15 H15 120.4 . . ? 
C15 C16 C17 120.1(4) . . ? 
C15 C16 H16 119.9 . . ? 
C17 C16 H16 119.9 . . ? 
C18 C17 C16 120.9(4) . . ? 
C18 C17 H17 119.6 . . ? 
C16 C17 H17 119.6 . . ? 
C13 C18 C17 118.8(4) . . ? 
C13 C18 H18 120.6 . . ? 
C17 C18 H18 120.6 . . ? 
O3 C19 N1 117.9(4) . . ? 
O3 C19 C20 124.4(4) . . ? 
N1 C19 C20 117.6(3) . . ? 
C25 C20 C21 119.4(4) . . ? 
C25 C20 C19 123.5(4) . . ? 
C21 C20 C19 116.9(4) . . ? 
C22 C21 C20 120.1(4) . . ? 
C22 C21 H21 119.9 . . ? 
C20 C21 H21 119.9 . . ? 
C21 C22 C23 119.5(4) . . ? 
C21 C22 H22 120.3 . . ? 
C23 C22 H22 120.3 . . ? 
C24 C23 C22 120.3(4) . . ? 
C24 C23 H23 119.9 . . ? 
C22 C23 H23 119.9 . . ? 
C25 C24 C23 120.9(4) . . ? 
C25 C24 H24 119.5 . . ? 
C23 C24 H24 119.5 . . ? 
C24 C25 C20 119.7(4) . . ? 
C24 C25 H25 120.1 . . ? 
C20 C25 H25 120.1 . . ? 
C3 C26 C27 121.3(4) . . ? 
C3 C26 H26 119.3 . . ? 
C27 C26 H26 119.3 . . ? 
C26 C27 C28 118.3(4) . . ? 
C26 C27 C30 123.9(4) . . ? 
C28 C27 C30 117.6(4) . . ? 
C29 C28 C27 121.4(4) . . ? 
C29 C28 H28 119.3 . . ? 
C27 C28 H28 119.3 . . ? 
C28 C29 C4 119.9(4) . . ? 
C28 C29 H29 120.1 . . ? 
C4 C29 H29 120.1 . . ? 
O4 C30 C27 117.8(3) . . ? 
O4 C30 C31 119.1(3) . . ? 
C27 C30 C31 123.1(3) . . ? 
C36 C31 C32 118.8(3) . . ? 
C36 C31 C30 119.4(4) . . ? 
C32 C31 C30 121.7(4) . . ? 
C33 C32 C31 120.5(4) . . ? 
C33 C32 H32 119.7 . . ? 
C31 C32 H32 119.7 . . ? 
C32 C33 C34 119.9(4) . . ? 
C32 C33 H33 120.0 . . ? 
C34 C33 H33 120.0 . . ? 
C33 C34 C35 120.2(4) . . ? 
C33 C34 H34 119.9 . . ? 
C35 C34 H34 119.9 . . ? 
C36 C35 C34 119.6(4) . . ? 
C36 C35 H35 120.2 . . ? 
C34 C35 H35 120.2 . . ? 
C35 C36 C31 120.9(4) . . ? 
C35 C36 H36 119.6 . . ? 
C31 C36 H36 119.6 . . ? 
C101 N101 C104 121.2(3) . . ? 
C101 N101 C119 120.0(3) . . ? 
C104 N101 C119 118.0(3) . . ? 
C112 N102 C103 126.5(3) . . ? 
C112 N102 C102 119.8(3) . . ? 
C103 N102 C102 113.5(3) . . ? 
O101 C101 N101 123.1(4) . . ? 
O101 C101 C102 124.4(4) . . ? 
N101 C101 C102 112.5(3) . . ? 
N102 C102 C101 108.4(3) . . ? 
N102 C102 C105 110.8(3) . . ? 
C101 C102 C105 110.9(3) . . ? 
N102 C102 H102 108.9 . . ? 
C101 C102 H102 108.9 . . ? 
C105 C102 H102 108.9 . . ? 
C104 C103 C126 119.6(4) . . ? 
C104 C103 N102 117.4(3) . . ? 
C126 C103 N102 122.6(4) . . ? 
C103 C104 C129 120.8(3) . . ? 
C103 C104 N101 119.6(4) . . ? 
C129 C104 N101 119.5(3) . . ? 
C106 C105 C102 115.8(3) . . ? 
C106 C105 H05A 108.3 . . ? 
C102 C105 H05A 108.3 . . ? 
C106 C105 H05B 108.3 . . ? 
C102 C105 H05B 108.3 . . ? 
H05A C105 H05B 107.4 . . ? 
C107 C106 C111 119.1(4) . . ? 
C107 C106 C105 122.8(4) . . ? 
C111 C106 C105 118.0(4) . . ? 
C106 C107 C108 120.6(4) . . ? 
C106 C107 H107 119.7 . . ? 
C108 C107 H107 119.7 . . ? 
C109 C108 C107 119.2(4) . . ? 
C109 C108 H108 120.4 . . ? 
C107 C108 H108 120.4 . . ? 
C108 C109 C110 121.5(4) . . ? 
C108 C109 Br2 119.0(4) . . ? 
C110 C109 Br2 119.5(3) . . ? 
C111 C110 C109 119.4(4) . . ? 
C111 C110 H110 120.3 . . ? 
C109 C110 H110 120.3 . . ? 
C110 C111 C106 120.2(4) . . ? 
C110 C111 H111 119.9 . . ? 
C106 C111 H111 119.9 . . ? 
O102 C112 N102 120.7(3) . . ? 
O102 C112 C113 120.0(3) . . ? 
N102 C112 C113 119.3(3) . . ? 
C114 C113 C118 119.6(3) . . ? 
C114 C113 C112 118.2(3) . . ? 
C118 C113 C112 121.9(3) . . ? 
C113 C114 C115 120.6(4) . . ? 
C113 C114 H114 119.7 . . ? 
C115 C114 H114 119.7 . . ? 
C116 C115 C114 119.9(4) . . ? 
C116 C115 H115 120.0 . . ? 
C114 C115 H115 120.0 . . ? 
C115 C116 C117 119.4(4) . . ? 
C115 C116 H116 120.3 . . ? 
C117 C116 H116 120.3 . . ? 
C118 C117 C116 119.8(4) . . ? 
C118 C117 H117 120.1 . . ? 
C116 C117 H117 120.1 . . ? 
C113 C118 C117 120.7(4) . . ? 
C113 C118 H118 119.7 . . ? 
C117 C118 H118 119.7 . . ? 
O103 C119 N101 118.5(4) . . ? 
O103 C119 C120 123.4(4) . . ? 
N101 C119 C120 117.9(4) . . ? 
C121 C120 C125 119.4(4) . . ? 
C121 C120 C119 117.4(4) . . ? 
C125 C120 C119 123.0(4) . . ? 
C122 C121 C120 120.5(5) . . ? 
C122 C121 H121 119.7 . . ? 
C120 C121 H121 119.7 . . ? 
C123 C122 C121 118.7(5) . . ? 
C123 C122 H122 120.6 . . ? 
C121 C122 H122 120.6 . . ? 
C122 C123 C124 121.6(4) . . ? 
C122 C123 H123 119.2 . . ? 
C124 C123 H123 119.2 . . ? 
C125 C124 C123 119.7(5) . . ? 
C125 C124 H124 120.1 . . ? 
C123 C124 H124 120.1 . . ? 
C124 C125 C120 120.0(4) . . ? 
C124 C125 H125 120.0 . . ? 
C120 C125 H125 120.0 . . ? 
C127 C126 C103 120.4(4) . . ? 
C127 C126 H126 119.8 . . ? 
C103 C126 H126 119.8 . . ? 
C126 C127 C128 118.8(4) . . ? 
C126 C127 C130 123.8(4) . . ? 
C128 C127 C130 117.2(4) . . ? 
C129 C128 C127 121.1(4) . . ? 
C129 C128 H128 119.5 . . ? 
C127 C128 H128 119.5 . . ? 
C128 C129 C104 119.2(4) . . ? 
C128 C129 H129 120.4 . . ? 
C104 C129 H129 120.4 . . ? 
O104 C130 C131 117.9(4) . . ? 
O104 C130 C127 118.7(4) . . ? 
C131 C130 C127 123.4(4) . . ? 
C136 C131 C132 119.3(4) . . ? 
C136 C131 C130 118.6(4) . . ? 
C132 C131 C130 121.8(4) . . ? 
C133 C132 C131 119.7(4) . . ? 
C133 C132 H132 120.1 . . ? 
C131 C132 H132 120.1 . . ? 
C132 C133 C134 119.8(4) . . ? 
C132 C133 H133 120.1 . . ? 
C134 C133 H133 120.1 . . ? 
C135 C134 C133 120.5(4) . . ? 
C135 C134 H134 119.7 . . ? 
C133 C134 H134 119.7 . . ? 
C136 C135 C134 119.9(4) . . ? 
C136 C135 H135 120.0 . . ? 
C134 C135 H135 120.0 . . ? 
C135 C136 C131 120.7(4) . . ? 
C135 C136 H136 119.6 . . ? 
C131 C136 H136 119.6 . . ? 
 
loop_ 
 _geom_torsion_atom_site_label_1 
 _geom_torsion_atom_site_label_2 
 _geom_torsion_atom_site_label_3 
 _geom_torsion_atom_site_label_4 
 _geom_torsion 
 _geom_torsion_site_symmetry_1 
 _geom_torsion_site_symmetry_2 
 _geom_torsion_site_symmetry_3 
 _geom_torsion_site_symmetry_4 
 _geom_torsion_publ_flag 
C4 N1 C1 O1 174.7(3) . . . . ? 
C19 N1 C1 O1 9.9(5) . . . . ? 
C4 N1 C1 C2 -4.0(4) . . . . ? 
C19 N1 C1 C2 -168.8(3) . . . . ? 
C12 N2 C2 C5 -110.6(4) . . . . ? 
C3 N2 C2 C5 65.3(4) . . . . ? 
C12 N2 C2 C1 124.3(3) . . . . ? 
C3 N2 C2 C1 -59.8(4) . . . . ? 
O1 C1 C2 N2 -136.1(3) . . . . ? 
N1 C1 C2 N2 42.7(4) . . . . ? 
O1 C1 C2 C5 100.4(4) . . . . ? 
N1 C1 C2 C5 -80.9(4) . . . . ? 
C12 N2 C3 C26 40.2(5) . . . . ? 
C2 N2 C3 C26 -135.2(4) . . . . ? 
C12 N2 C3 C4 -147.4(4) . . . . ? 
C2 N2 C3 C4 37.2(4) . . . . ? 
C26 C3 C4 C29 0.5(5) . . . . ? 
N2 C3 C4 C29 -172.3(3) . . . . ? 
C26 C3 C4 N1 177.7(3) . . . . ? 
N2 C3 C4 N1 4.9(5) . . . . ? 
C1 N1 C4 C29 155.3(3) . . . . ? 
C19 N1 C4 C29 -39.2(4) . . . . ? 
C1 N1 C4 C3 -21.9(5) . . . . ? 
C19 N1 C4 C3 143.6(3) . . . . ? 
N2 C2 C5 C6 -163.5(3) . . . . ? 
C1 C2 C5 C6 -41.9(5) . . . . ? 
C2 C5 C6 C7 -61.0(5) . . . . ? 
C2 C5 C6 C11 119.2(4) . . . . ? 
C11 C6 C7 C8 1.3(6) . . . . ? 
C5 C6 C7 C8 -178.6(4) . . . . ? 
C6 C7 C8 C9 -0.4(6) . . . . ? 
C7 C8 C9 C10 0.2(6) . . . . ? 
C7 C8 C9 Br1 180.0(3) . . . . ? 
C8 C9 C10 C11 -1.0(6) . . . . ? 
Br1 C9 C10 C11 179.3(3) . . . . ? 
C9 C10 C11 C6 1.9(6) . . . . ? 
C7 C6 C11 C10 -2.1(6) . . . . ? 
C5 C6 C11 C10 177.8(4) . . . . ? 
C3 N2 C12 O2 -163.7(3) . . . . ? 
C2 N2 C12 O2 11.5(5) . . . . ? 
C3 N2 C12 C13 18.5(5) . . . . ? 
C2 N2 C12 C13 -166.3(3) . . . . ? 
O2 C12 C13 C18 -133.3(4) . . . . ? 
N2 C12 C13 C18 44.5(5) . . . . ? 
O2 C12 C13 C14 40.6(5) . . . . ? 
N2 C12 C13 C14 -141.6(4) . . . . ? 
C18 C13 C14 C15 -0.9(6) . . . . ? 
C12 C13 C14 C15 -174.9(4) . . . . ? 
C13 C14 C15 C16 1.2(6) . . . . ? 
C14 C15 C16 C17 -1.0(7) . . . . ? 
C15 C16 C17 C18 0.5(7) . . . . ? 
C14 C13 C18 C17 0.3(6) . . . . ? 
C12 C13 C18 C17 174.1(4) . . . . ? 
C16 C17 C18 C13 -0.2(7) . . . . ? 
C1 N1 C19 O3 126.1(4) . . . . ? 
C4 N1 C19 O3 -39.1(5) . . . . ? 
C1 N1 C19 C20 -57.1(5) . . . . ? 
C4 N1 C19 C20 137.7(3) . . . . ? 
O3 C19 C20 C25 163.3(4) . . . . ? 
N1 C19 C20 C25 -13.2(6) . . . . ? 
O3 C19 C20 C21 -11.8(6) . . . . ? 
N1 C19 C20 C21 171.7(3) . . . . ? 
C25 C20 C21 C22 -0.4(6) . . . . ? 
C19 C20 C21 C22 174.9(4) . . . . ? 
C20 C21 C22 C23 0.2(6) . . . . ? 
C21 C22 C23 C24 -0.4(6) . . . . ? 
C22 C23 C24 C25 0.8(6) . . . . ? 
C23 C24 C25 C20 -1.0(6) . . . . ? 
C21 C20 C25 C24 0.8(6) . . . . ? 
C19 C20 C25 C24 -174.2(4) . . . . ? 
C4 C3 C26 C27 0.1(5) . . . . ? 
N2 C3 C26 C27 172.3(3) . . . . ? 
C3 C26 C27 C28 -0.9(5) . . . . ? 
C3 C26 C27 C30 -175.0(3) . . . . ? 
C26 C27 C28 C29 0.9(5) . . . . ? 
C30 C27 C28 C29 175.5(3) . . . . ? 
C27 C28 C29 C4 -0.3(5) . . . . ? 
C3 C4 C29 C28 -0.5(5) . . . . ? 
N1 C4 C29 C28 -177.7(3) . . . . ? 
C26 C27 C30 O4 145.4(4) . . . . ? 
C28 C27 C30 O4 -28.8(5) . . . . ? 
C26 C27 C30 C31 -36.5(5) . . . . ? 
C28 C27 C30 C31 149.2(3) . . . . ? 
O4 C30 C31 C36 -20.0(5) . . . . ? 
C27 C30 C31 C36 162.0(4) . . . . ? 
O4 C30 C31 C32 156.0(4) . . . . ? 
C27 C30 C31 C32 -22.0(6) . . . . ? 
C36 C31 C32 C33 -1.7(6) . . . . ? 
C30 C31 C32 C33 -177.7(4) . . . . ? 
C31 C32 C33 C34 0.9(6) . . . . ? 
C32 C33 C34 C35 0.6(7) . . . . ? 
C33 C34 C35 C36 -1.1(6) . . . . ? 
C34 C35 C36 C31 0.2(6) . . . . ? 
C32 C31 C36 C35 1.2(6) . . . . ? 
C30 C31 C36 C35 177.3(4) . . . . ? 
C104 N101 C101 O101 170.1(3) . . . . ? 
C119 N101 C101 O101 -0.2(5) . . . . ? 
C104 N101 C101 C102 -12.4(4) . . . . ? 
C119 N101 C101 C102 177.4(3) . . . . ? 
C112 N102 C102 C101 115.7(4) . . . . ? 
C103 N102 C102 C101 -59.6(4) . . . . ? 
C112 N102 C102 C105 -122.3(4) . . . . ? 
C103 N102 C102 C105 62.3(4) . . . . ? 
O101 C101 C102 N102 -134.8(3) . . . . ? 
N101 C101 C102 N102 47.7(4) . . . . ? 
O101 C101 C102 C105 103.3(4) . . . . ? 
N101 C101 C102 C105 -74.2(4) . . . . ? 
C112 N102 C103 C104 -140.9(4) . . . . ? 
C102 N102 C103 C104 34.1(4) . . . . ? 
C112 N102 C103 C126 46.3(5) . . . . ? 
C102 N102 C103 C126 -138.7(3) . . . . ? 
C126 C103 C104 C129 0.4(5) . . . . ? 
N102 C103 C104 C129 -172.6(3) . . . . ? 
C126 C103 C104 N101 177.3(3) . . . . ? 
N102 C103 C104 N101 4.3(5) . . . . ? 
C101 N101 C104 C103 -15.1(5) . . . . ? 
C119 N101 C104 C103 155.3(3) . . . . ? 
C101 N101 C104 C129 161.8(3) . . . . ? 
C119 N101 C104 C129 -27.8(5) . . . . ? 
N102 C102 C105 C106 -179.6(3) . . . . ? 
C101 C102 C105 C106 -59.1(5) . . . . ? 
C102 C105 C106 C107 -35.0(6) . . . . ? 
C102 C105 C106 C111 146.3(4) . . . . ? 
C111 C106 C107 C108 -0.8(6) . . . . ? 
C105 C106 C107 C108 -179.4(4) . . . . ? 
C106 C107 C108 C109 1.6(6) . . . . ? 
C107 C108 C109 C110 -1.0(7) . . . . ? 
C107 C108 C109 Br2 178.3(3) . . . . ? 
C108 C109 C110 C111 -0.5(7) . . . . ? 
Br2 C109 C110 C111 -179.7(4) . . . . ? 
C109 C110 C111 C106 1.3(7) . . . . ? 
C107 C106 C111 C110 -0.7(6) . . . . ? 
C105 C106 C111 C110 178.0(4) . . . . ? 
C103 N102 C112 O102 -173.5(3) . . . . ? 
C102 N102 C112 O102 11.8(5) . . . . ? 
C103 N102 C112 C113 9.8(5) . . . . ? 
C102 N102 C112 C113 -164.9(3) . . . . ? 
O102 C112 C113 C114 48.8(5) . . . . ? 
N102 C112 C113 C114 -134.5(4) . . . . ? 
O102 C112 C113 C118 -124.6(4) . . . . ? 
N102 C112 C113 C118 52.0(5) . . . . ? 
C118 C113 C114 C115 -1.1(6) . . . . ? 
C112 C113 C114 C115 -174.7(4) . . . . ? 
C113 C114 C115 C116 0.9(6) . . . . ? 
C114 C115 C116 C117 0.6(6) . . . . ? 
C115 C116 C117 C118 -1.8(6) . . . . ? 
C114 C113 C118 C117 -0.1(6) . . . . ? 
C112 C113 C118 C117 173.2(4) . . . . ? 
C116 C117 C118 C113 1.6(6) . . . . ? 
C101 N101 C119 O103 127.2(4) . . . . ? 
C104 N101 C119 O103 -43.4(5) . . . . ? 
C101 N101 C119 C120 -58.1(5) . . . . ? 
C104 N101 C119 C120 131.3(4) . . . . ? 
O103 C119 C120 C121 -10.5(6) . . . . ? 
N101 C119 C120 C121 175.1(3) . . . . ? 
O103 C119 C120 C125 164.5(4) . . . . ? 
N101 C119 C120 C125 -10.0(6) . . . . ? 
C125 C120 C121 C122 -0.4(6) . . . . ? 
C119 C120 C121 C122 174.7(4) . . . . ? 
C120 C121 C122 C123 -0.2(7) . . . . ? 
C121 C122 C123 C124 1.3(7) . . . . ? 
C122 C123 C124 C125 -1.8(7) . . . . ? 
C123 C124 C125 C120 1.2(7) . . . . ? 
C121 C120 C125 C124 -0.1(7) . . . . ? 
C119 C120 C125 C124 -175.0(4) . . . . ? 
C104 C103 C126 C127 2.5(5) . . . . ? 
N102 C103 C126 C127 175.1(3) . . . . ? 
C103 C126 C127 C128 -4.1(5) . . . . ? 
C103 C126 C127 C130 -178.5(4) . . . . ? 
C126 C127 C128 C129 2.8(6) . . . . ? 
C130 C127 C128 C129 177.6(4) . . . . ? 
C127 C128 C129 C104 0.1(6) . . . . ? 
C103 C104 C129 C128 -1.7(6) . . . . ? 
N101 C104 C129 C128 -178.6(3) . . . . ? 
C126 C127 C130 O104 156.9(4) . . . . ? 
C128 C127 C130 O104 -17.6(6) . . . . ? 
C126 C127 C130 C131 -22.4(6) . . . . ? 
C128 C127 C130 C131 163.1(4) . . . . ? 
O104 C130 C131 C136 -25.9(6) . . . . ? 
C127 C130 C131 C136 153.4(4) . . . . ? 
O104 C130 C131 C132 147.0(4) . . . . ? 
C127 C130 C131 C132 -33.7(6) . . . . ? 
C136 C131 C132 C133 1.5(6) . . . . ? 
C130 C131 C132 C133 -171.3(4) . . . . ? 
C131 C132 C133 C134 -0.6(7) . . . . ? 
C132 C133 C134 C135 -1.1(8) . . . . ? 
C133 C134 C135 C136 1.7(7) . . . . ? 
C134 C135 C136 C131 -0.7(7) . . . . ? 
C132 C131 C136 C135 -0.9(7) . . . . ? 
C130 C131 C136 C135 172.1(4) . . . . ? 
 
_diffrn_measured_fraction_theta_max    0.994 
_diffrn_reflns_theta_full              27.48 
_diffrn_measured_fraction_theta_full   0.994 
_refine_diff_density_max    0.516 
_refine_diff_density_min   -0.542 
_refine_diff_density_rms    0.066 

_symmetry_cell_setting           'Monoclinic'
_symmetry_space_group_name_H-M   'P2(1)   '

loop_
 _exptl_crystal_face_index_h
 _exptl_crystal_face_index_k
 _exptl_crystal_face_index_l
 _exptl_crystal_face_perp_dist
   -1.00    0.00  -27.00    0.0358
  -21.00    2.00    2.00    0.1447
   21.00    2.00   -4.00    0.0222
   -4.00    5.00   26.00    0.0819
   -2.00    4.00  -26.00    0.0511
   -4.00   -3.00   27.00    0.1055
   -5.00   12.00  -15.00    0.0708
   21.00   -4.00   -4.00    0.0201
    0.00  -13.00  -14.00    0.0146
   -4.00    8.00   23.00    0.0714
    6.00  -13.00    9.00    0.0749
  -16.00   -3.00   21.00    0.1437
   -8.00   14.00    4.00    0.0805
   17.00   -4.00  -19.00    0.0235
